# Supplementary material for: Early Pregnancy in Jennies in the Caribbean: Corpus Luteum Development and Progesterone Production, Uterine and Embryo Dynamics, Conceptus Growth and Maturation
Source: MDPI journal article supplement (doi:10.3390/ani12020127), 2022-01-06
Supplement: s1 [file s1]

## Supplement

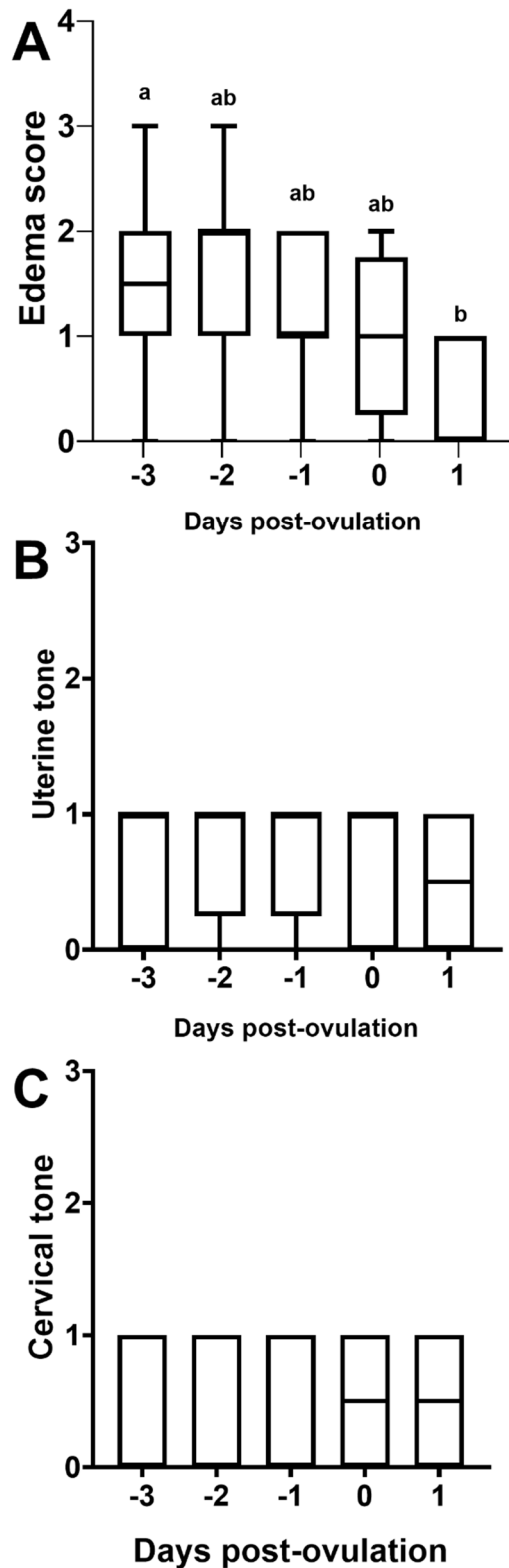

**Figure S1.** Median and interquartile ranges of endometrial edema (A), uterine (B), and cervical tone (C) of jennies (n = 8) during the days from ovulation. Day 0, day of ovulation. Endometrial edema: 0, no edema; 1, mild edema; 2, moderate edema; 3, evident edema; 4, exacerbated edema. Uterine and cervical tone: 0, flaccid and 3, turgid. Different superscripts (<sup>a,b</sup>) denotes difference between moments ( $P < 0.05$ ).

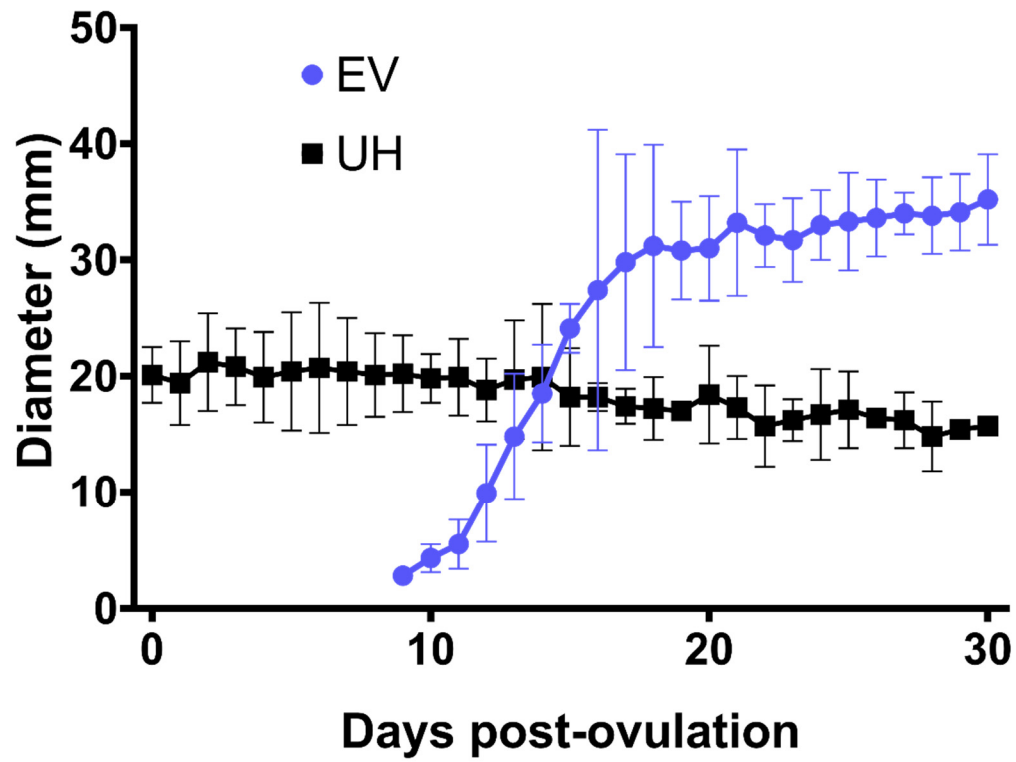

**Figure S2.** Mean  $\pm$  SD of the uterine horn (UH) and the embryonic vesicle (EV) diameters during the first 30 days of pregnancy in eight Caribbean jennies. Day of ovulation, day 0.

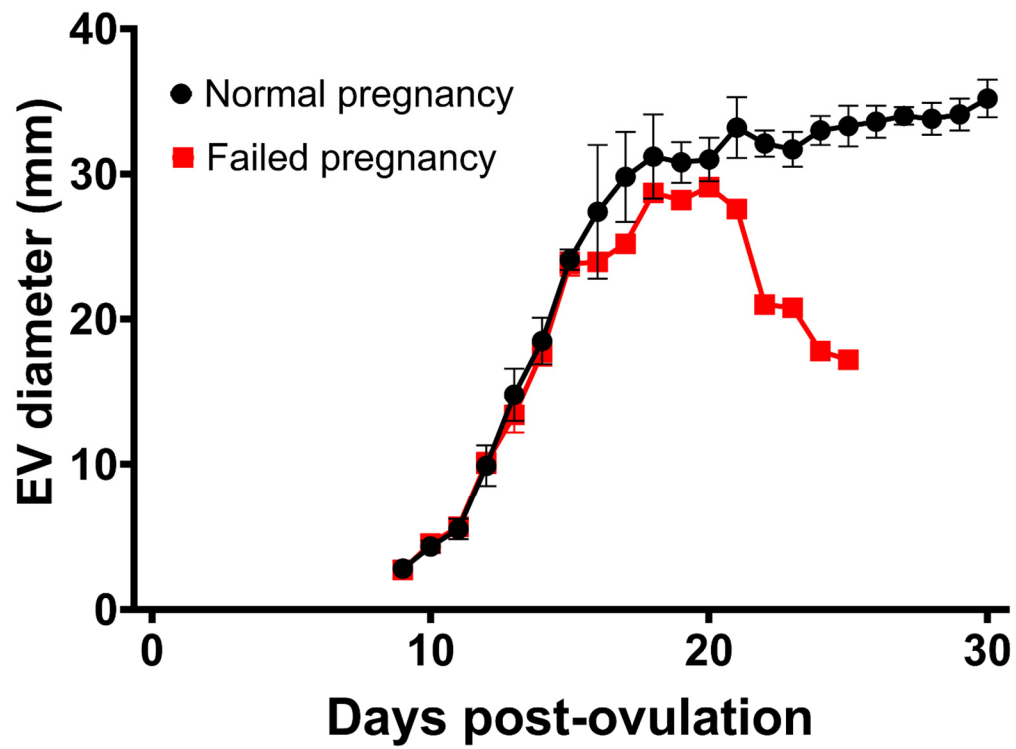

**Figure S3.** Mean $\pm$ SEM diameter of embryonic vesicle from the day of detection (Day 9-10) to Day 30 of pregnancy for embryos surviving at least to 30 days (Normal pregnancy), and for one individual pregnancy that terminated spontaneously 22 days after ovulation (Failed pregnancy).

**Table S1.** Mixed effects linear regression coefficients for CL volume for the first 10 days after ovulation, with jenny as random variable.

| <b>Factor</b>    | <b>Coefficient</b> | <b>St. Error</b> | <b>z</b> | <b>P&gt; z </b> | <b>95% confidence interval</b> |      |
|------------------|--------------------|------------------|----------|-----------------|--------------------------------|------|
| <b>Pregnancy</b> | 0.70               | 0.45             | 6.2      | 0.123           | -0.19                          | 1.58 |
| <b>Day</b>       | 0.38               | 0.06             | 6.2      | 0.000           | 0.26                           | 0.50 |
| <b>Constant</b>  | 5.5                | 0.61             | 9.01     | 0.000           | 4.31                           | 6.70 |

**Table S2.** Mixed effects linear regression for progesterone concentration for first 10 days after ovulation, with jenny as random variable.

| <b>Factor</b>    | <b>Coefficient</b> | <b>St. Error</b> | <b>z</b> | <b>P&gt; z </b> | <b>95% confidence interval</b> |      |
|------------------|--------------------|------------------|----------|-----------------|--------------------------------|------|
| <b>Pregnancy</b> | 4.25               | 0.98             | 4.35     | 0.000           | 2.34                           | 6.16 |
| <b>Day</b>       | 2.74               | 0.14             | 19.26    | 0.000           | 2.46                           | 3.02 |
| <b>Constant</b>  | 3.23               | 1.91             | 1.70     | 0.090           | -0.50                          | 6.97 |

**Table S3.** Mixed effects linear regression coefficients for embryonic vesicle diameter, including jenny as random variable, up to Day 18 after ovulation.

| <b>Factor</b>   | <b>Coefficient</b> | <b>St. Error</b> | <b>z</b> | <b>P&gt; z </b> | <b>95% confidence interval</b> |        |
|-----------------|--------------------|------------------|----------|-----------------|--------------------------------|--------|
| <b>Day</b>      | 2.98               | 0.22             | 13.51    | 0.000           | 2.55                           | 3.42   |
| <b>Cum. P4</b>  | 0.025              | 0.007            | 3.38     | 0.001           | 0.011                          | 0.39   |
| <b>Constant</b> | -31.99             | 1.44             | -22.27   | 0.000           | -34.82                         | -29.18 |
